# Supplementary material for: Genistein improves glucose metabolism and promotes adipose tissue browning through modulating gut microbiota in mice
Source: Royal Society of Chemistry journal article supplement (doi:10.1039/d2fo01973f), 2022-01-01

## *Supplementary Material*

### **1 Supplementary Figures and Tables**

#### **1.1 Supplementary Tables**

**Table S1.** Primer sequences for *UCP1*, *PGC1 $\alpha$* , *PPAR $\alpha$* , *PPAR $\gamma$* , *PRDM16* and *PPIA*.

| Genes                          | Primer sequence                                     |
|--------------------------------|-----------------------------------------------------|
| <i>UCP1</i>                    | F-TCTCTGCCAGGACAGTACCCAA; R-GAGTCGCAGAAAAGAAGCCACAA |
| <i>PGC1<math>\alpha</math></i> | F-TATGGAGTGACATAGAGTGTGCT; R-CCAATTCAATCCACCCAGAAAG |
| <i>PPAR<math>\alpha</math></i> | F-AGAGCCCCATCTGTCCTCTC; R-ACTGGTAGTCTGCAAAACCAAA    |
| <i>PPAR<math>\gamma</math></i> | F-TCGCTGATGCACTGCCTATG; R-GAGAGGTCCACAGAGCTGATT     |
| <i>PRDM16</i>                  | F-CAGCACGGTGAAGCCATTC; R-GCGTGCATCCGCTTGTG          |
| <i>PPIA</i>                    | F-GCTGGACCAAACACAAACGG; R-TCCTGGACCCAAAACGCTC       |

## 1.2 Supplementary Figures

**Figure S1.** (A) Formula for dose translation based on body surface area. (B) The  $K_m$  value among human and experimental animals. HED, human equivalent dose;  $K_m$  factor, a parameter used to convert the mg/kg dose to an mg/m<sup>2</sup> dose.

**A** 
$$\text{HED (mg/kg)} = \text{Animal dose (mg/kg)} \text{ multiplied by } \frac{\text{Animal } K_m}{\text{Human } K_m}$$

**B**

| Species | Weight (kg) | BSA (m <sup>2</sup> ) | $K_m$ factor |
|---------|-------------|-----------------------|--------------|
| Human   |             |                       |              |
| Adult   | 60          | 1.6                   | 37           |
| Child   | 20          | 0.8                   | 25           |
| Rat     | 0.15        | 0.025                 | 6            |
| Mouse   | 0.02        | 0.007                 | 3            |

**Figure S2.** The relative gene expression levels of thermogenesis indicator in the interscapular brown adipose tissue of lean mice. CD, normal control diet with vehicle; CG, normal control diet with genistein; CABX, normal control diet with genistein and antibiotic cocktail. *UCP1*, uncoupling protein 1; *PGC1 $\alpha$* , peroxisome proliferator-activated receptor gamma coactivator 1-alpha; *PPAR $\alpha$* , peroxisome proliferator-activated receptor alpha; *PPAR $\gamma$* , peroxisome proliferator-activated receptor gamma; *PRDM16*, positive regulatory domain containing 16. Data were expressed as means  $\pm$  S.E.M. (n = 5-6 / group) and were analyzed by one-way ANOVA.

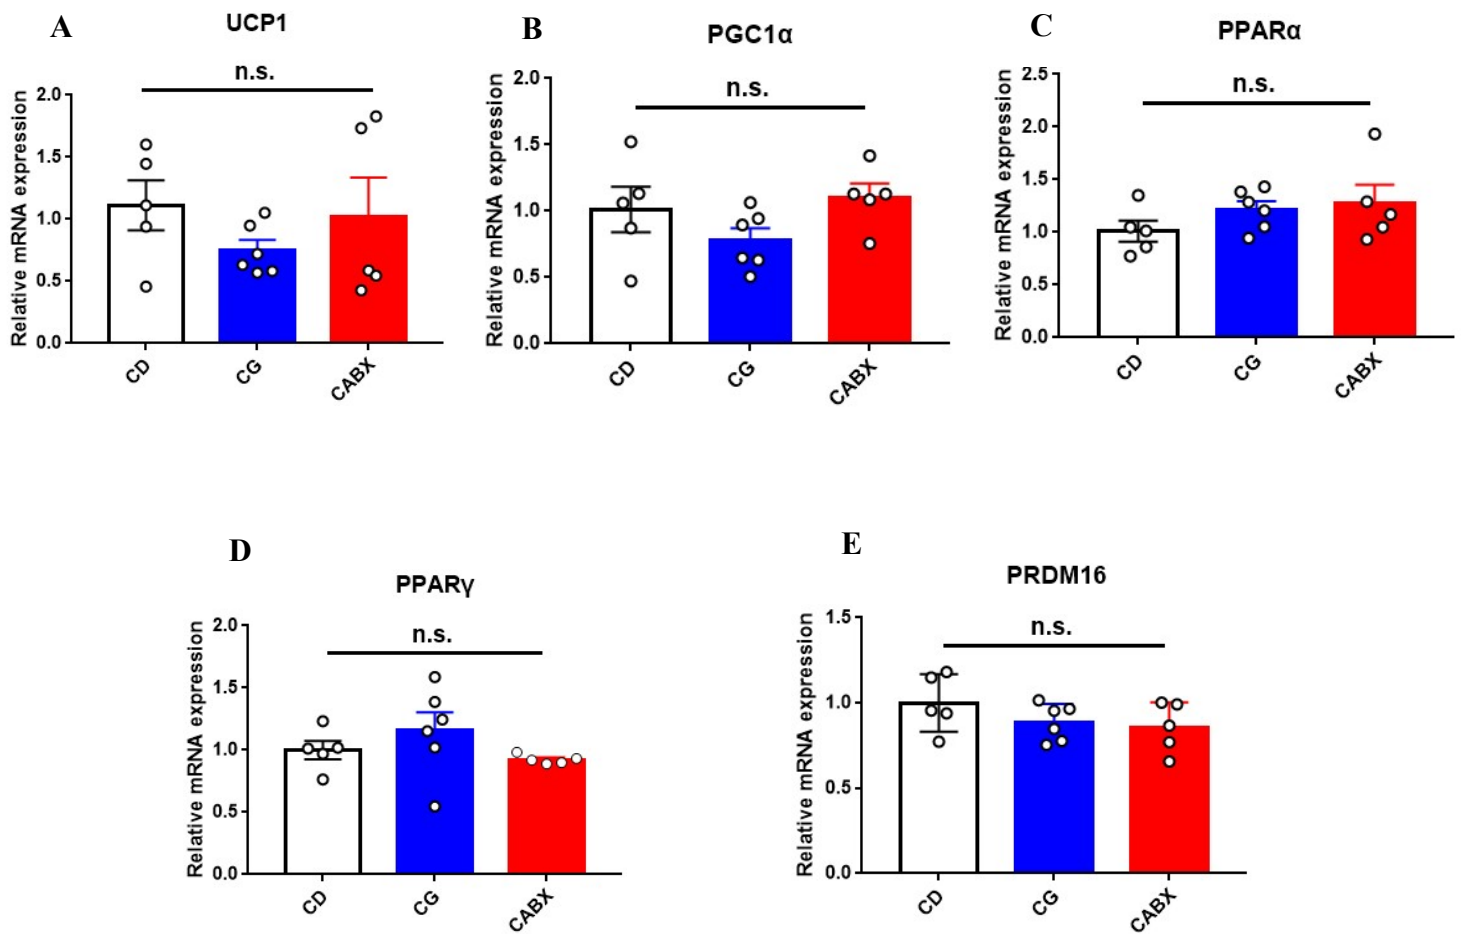

**Figure S3.** The relative gene expression levels of browning markers in the inguinal subcutaneous adipose tissue of obesity mice. HFD, high-fat diet with vehicle; HFG, high-fat diet with genistein; HFABX, high-fat diet with genistein and antibiotic cocktail. *UCP1*, uncoupling protein 1; *PGC1 $\alpha$* , peroxisome proliferator-activated receptor gamma coactivator 1-alpha; *PPAR $\alpha$* , peroxisome proliferator-activated receptor alpha; *PPAR $\gamma$* , peroxisome proliferator-activated receptor gamma; *PRDM16*, positive regulatory domain containing 16. Data were expressed as means  $\pm$  S.E.M. (n = 5-6 / group) and were analyzed by one-way ANOVA.

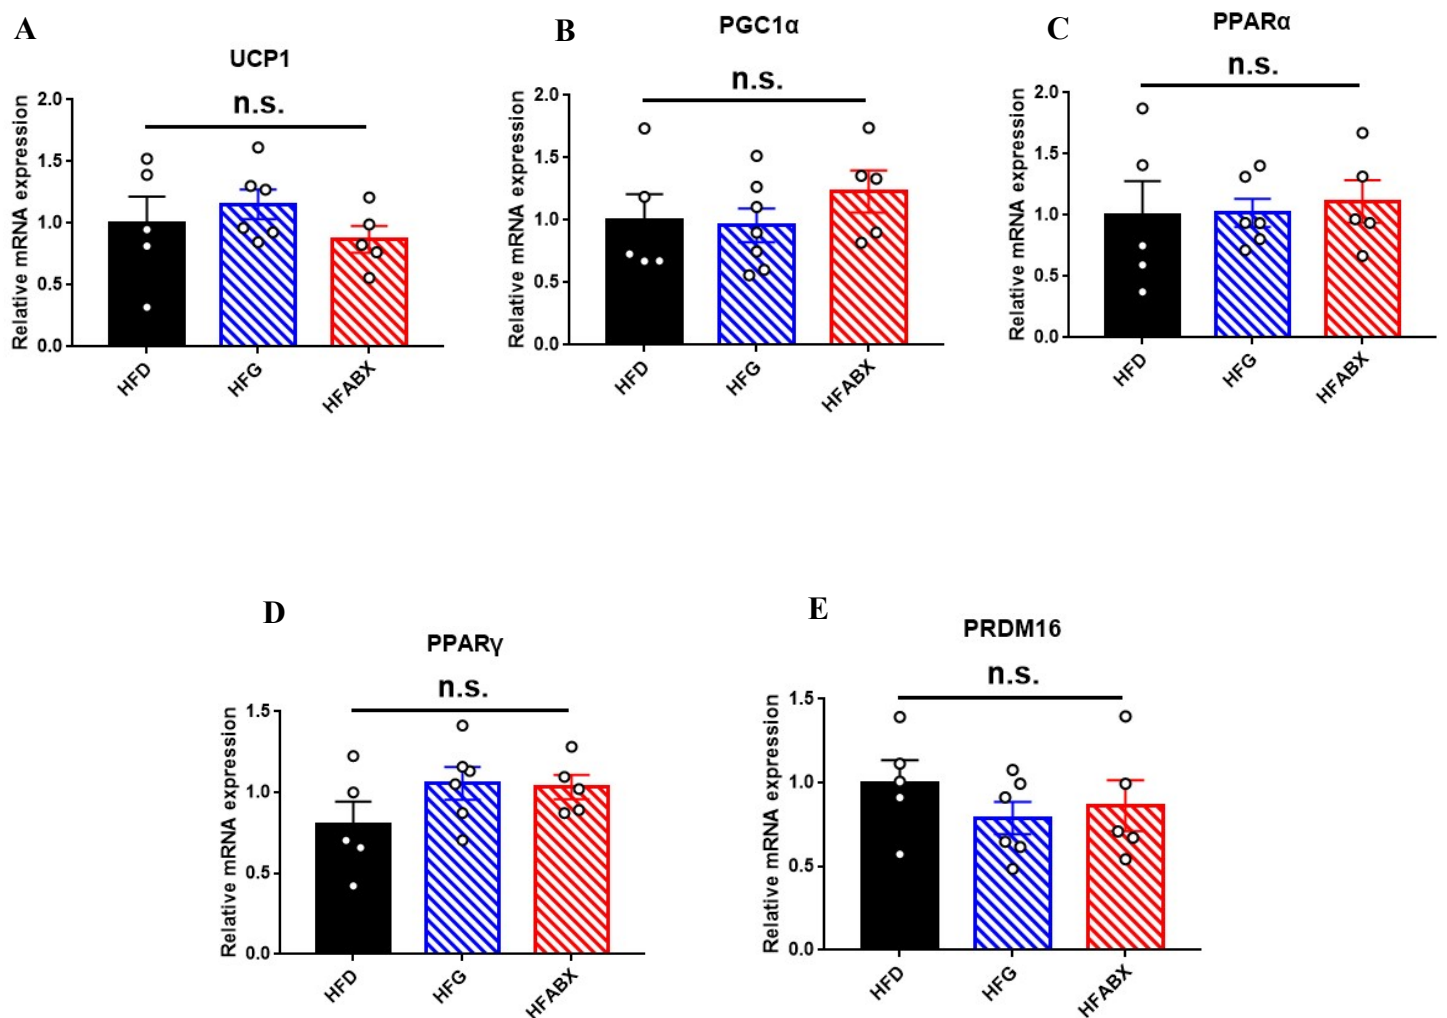

Supplement: d2fo01973f1.pdf [file d2fo01973f1.pdf]
